# Supplementary material
Source: MDPI journal article supplement (https://www.mdpi.com/2071-1050/13/12/6883)
Supplement: s1 [file s1]

Supplementary Information for

# Low-powered photodetector based on two-dimensional InS<sub>0.3</sub>Se<sub>0.7</sub>/WS<sub>2</sub> heterostructure

Kaiting Zhang <sup>1</sup>, Jie Chang <sup>1</sup>, Chaoyang Tan <sup>1</sup> and Hui Han <sup>1,\*</sup>

<sup>1</sup> Information Materials and Intelligent Sensing Laboratory of Anhui Province, Institutes of Physical Science and Information Technology, Anhui University, Hefei 230601, China

\* Correspondence: huihan@ahu.edu.cn

## 1. Raman spectra of the InS<sub>0.3</sub>Se<sub>0.7</sub> flakes

Fig. S1 show the Raman spectra of the InS<sub>0.3</sub>Se<sub>0.7</sub> flakes measured at room temperature. The photoluminescence spectra were collected on micro Raman/Photoluminescence system (InVia, Renishaw) using an argon green laser at 514 nm. As can be seen, four typical Raman active modes at about 41 cm<sup>-1</sup>, 119 cm<sup>-1</sup>, 180 cm<sup>-1</sup>, and 220 cm<sup>-1</sup>, respectively are observed in both areas, which corresponding to the *E*, *A*<sub>1g</sub><sup>1</sup>, *E*<sub>2g</sub><sup>1</sup>, and *A*<sub>1g</sub><sup>2</sup> modes. Such observation is also consistent with the previous reports [Cryst. Growth Des. 18, 2899–2904 (2018)].

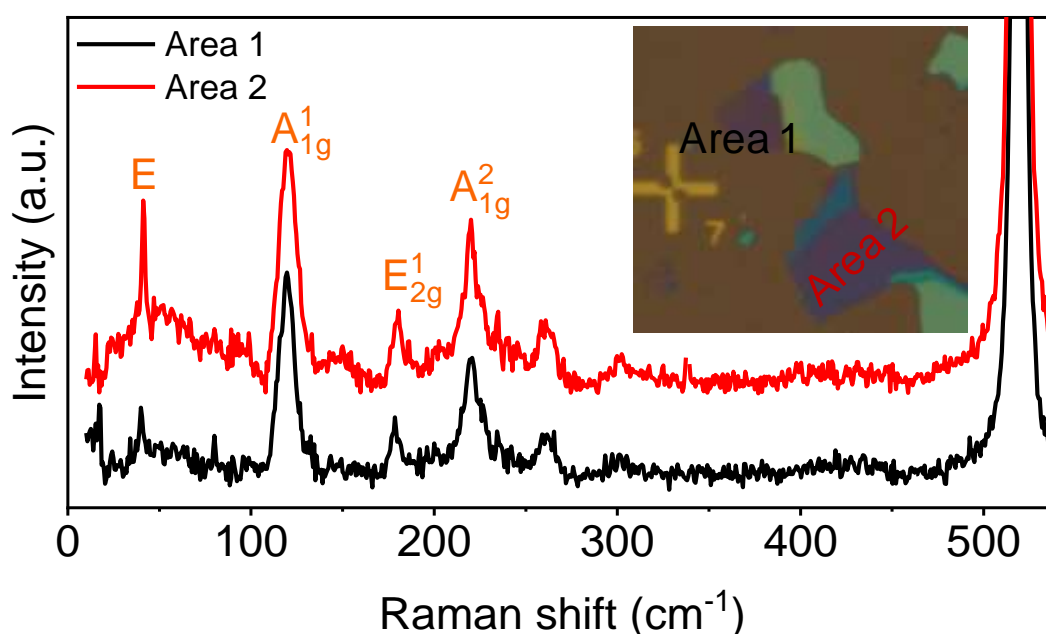

Fig. S1. Raman spectra of the InS<sub>0.3</sub>Se<sub>0.7</sub> flakes.

## 2. Estimation of the stoichiometry of the as-synthesized $\text{InS}_{0.3}\text{Se}_{0.7}$ crystals

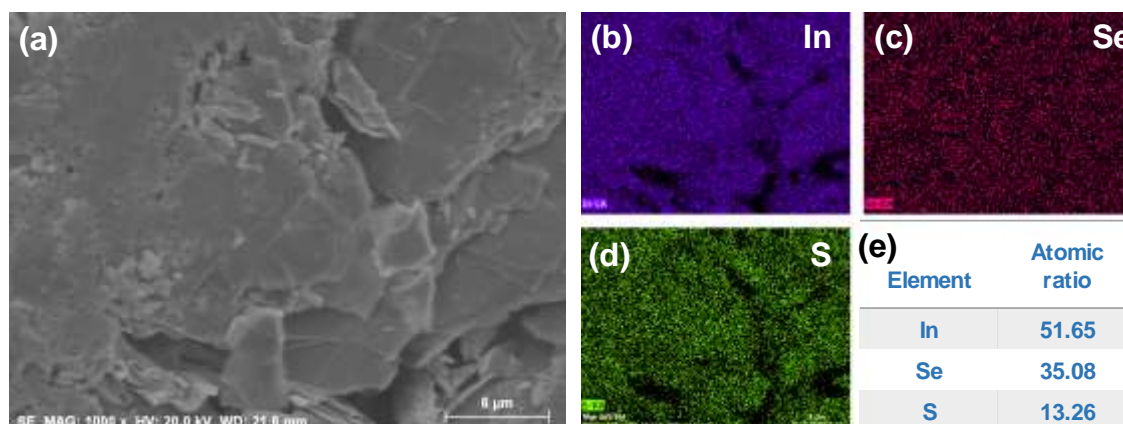

Fig. S2. SEM image (a) and EDS mapping spectra (b-e) of the as-synthesized  $\text{InS}_{0.3}\text{Se}_{0.7}$  crystals.

Fig. S2 show the scanning electron microscopy (SEM) image and Energy-dispersive X-ray spectroscopy (EDS) of the as-synthesized  $\text{InS}_{0.3}\text{Se}_{0.7}$  crystals. As can be seen, the as-synthesized  $\text{InS}_{0.3}\text{Se}_{0.7}$  crystals are of layered structures (Fig. S2(a)), and are composed of In, Se and S from the EDS mapping spectra (Fig. S2(b-d)). The atomic ratio of In, Se and S elements is estimated to be about 1:0.7:0.3 from the quantitative analysis of the EDS mapping spectra (Fig. S2(e)).

### 3. Photoluminescence spectra of the $\text{InS}_{0.3}\text{Se}_{0.7}/\text{WS}_2$ heterostructures

Fig. S3 show the photoluminescence (PL) spectra of the  $\text{InS}_{0.3}\text{Se}_{0.7}/\text{WS}_2$  heterostructures at different temperatures. The photoluminescence spectra were collected on micro Raman/Photoluminescence system (InVia, Renishaw) using an argon green laser at 514 nm. As can be seen, the PL peak of the  $\text{WS}_2$  flakes and  $\text{InS}_{0.3}\text{Se}_{0.7}$  flakes locate at about 622 nm and 869 nm, respectively. With increasing temperature, the PL peak gradually shifts to long wavelength, i.e. red shift, for both  $\text{WS}_2$  flakes and  $\text{InS}_{0.3}\text{Se}_{0.7}$  flakes.

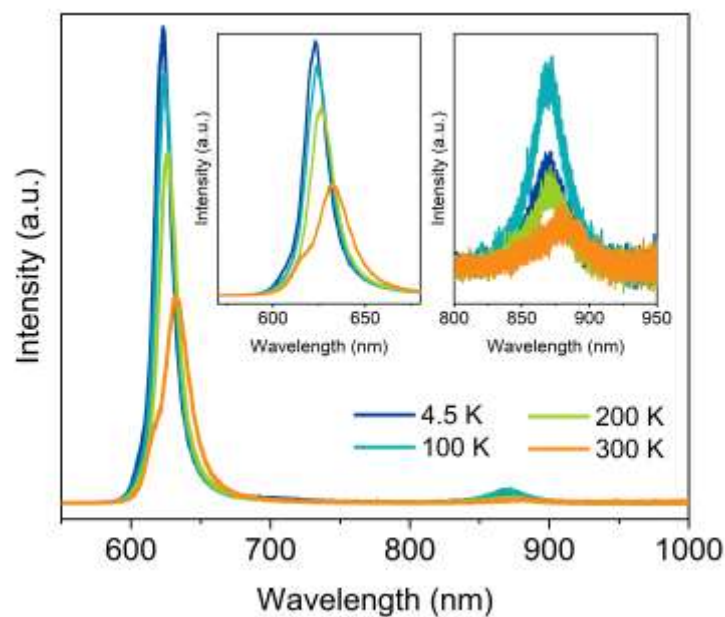

Fig. S3. Photoluminescence (PL) spectra of the  $\text{InS}_{0.3}\text{Se}_{0.7}/\text{WS}_2$  heterostructures measured at indicated temperatures.

### 4. Band diagram of the $\text{InS}_{0.3}\text{Se}_{0.7}/\text{WS}_2$ heterostructures

Fig. S4 show the schematic drawing of the band diagram of the  $\text{InS}_{0.3}\text{Se}_{0.7}/\text{WS}_2$  heterostructures. As can be seen, the depletion zone (as indicated by the green area) is formed at the interface of the  $\text{InS}_{0.3}\text{Se}_{0.7}$  flakes and  $\text{WS}_2$  flakes. When the light is irradiated on the  $\text{InS}_{0.3}\text{Se}_{0.7}/\text{WS}_2$  heterostructures, the photo-induced electron-hole will be separated at the interface and finally lead to the detection of the photocurrent.

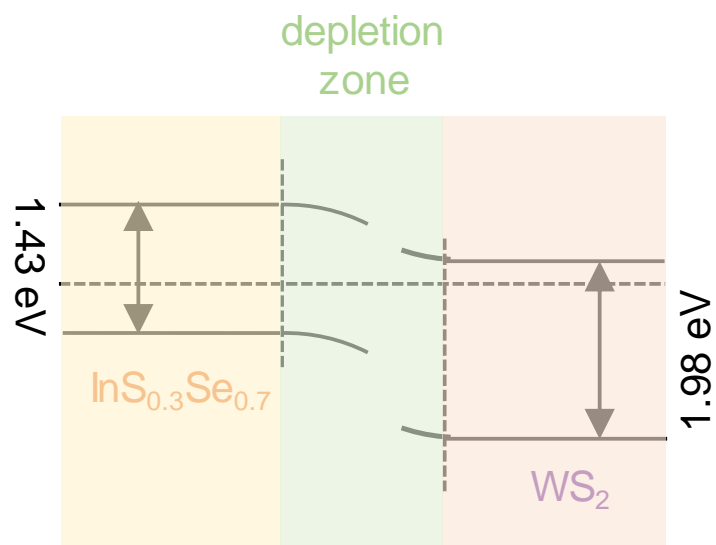

Fig. S4. Band diagram of the  $\text{InS}_{0.3}\text{Se}_{0.7}/\text{WS}_2$  heterostructures
